# Supplementary material
Source: PubMed Central journal article supplement (PMC3228454)
Supplement: 1110946108_pnas.201110946SI.pdf [file 1110946108_pnas.201110946SI.pdf]

# Supporting Information

Li et al. 10.1073/pnas.1110946108

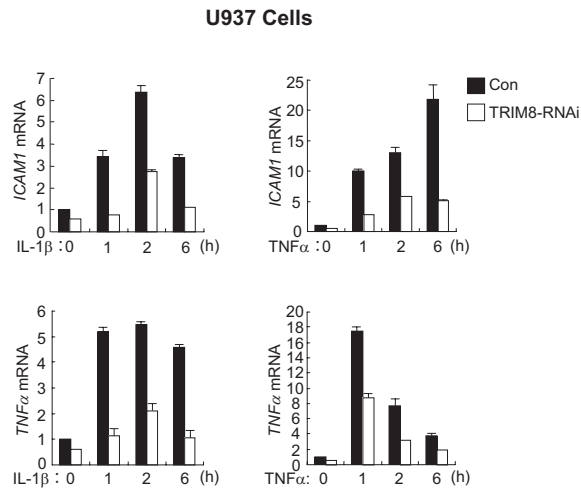

**Fig. S1.** Effects of TRIM8 RNAi on TNF $\alpha$ - or IL-1 $\beta$ -induced transcription of endogenous *ICAM1* and *TNF $\alpha$*  genes in U937 cells. U937 cells stably transduced with GFP control or TRIM8 RNAi were either untreated or treated with TNF $\alpha$  (10 ng/mL) or IL-1 $\beta$  (10 ng/mL) for the indicated time before RT-PCR experiments were performed.

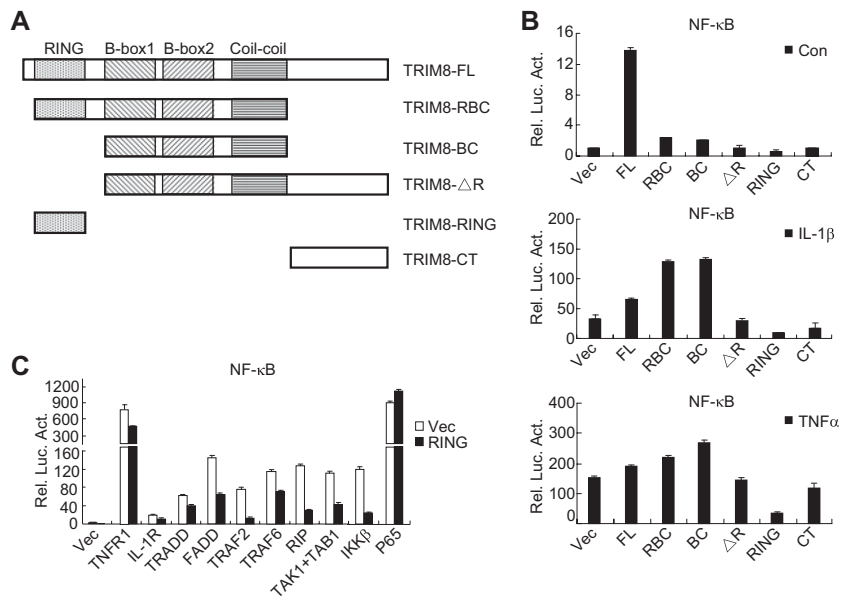

**Fig. S2.** TRIM8 mutant inhibits TAK1- but not p65-mediated NF- $\kappa$ B activation. (A) A schematic representation of wild-type TRIM8 and its deletion mutants. (B) Ring finger domain of TRIM8 (TRIM8-RING) acts as a dominant negative mutant. A total of 293 cells ( $1 \times 10^5$ ) were transfected with NF- $\kappa$ B reporter (0.01  $\mu$ g) and the indicated expression plasmids (0.2  $\mu$ g each). Twenty hours after transfection, cells were treated with buffer, TNF $\alpha$ , or IL-1 $\beta$  for 10 h before luciferase assays were performed. (C) The effects of TRIM8-RING on NF- $\kappa$ B activation mediated by various signaling components. A total of 293 cells ( $1 \times 10^5$ ) were transfected with NF- $\kappa$ B reporter (0.01  $\mu$ g) and the indicated expression plasmids (0.1  $\mu$ g) for 20 h before luciferase assays were performed.
